# Supplementary material for: Whole-Genome Sequencing Analysis of Non-Typhoidal Salmonella Isolated from Breeder Poultry Farm Sources in China, 2020–2021
Source: MDPI journal article supplement (doi:10.3390/antibiotics12111642), 2023-11-19
Supplement: s1 [file s1]

**Table S1.** The Information for 78 NTS isolates strains in this study.

| Numbers | Years | Regions  | Sources          | Breeds | Domestic or Imported Breeds | Serotypes   | Antimicrobial Resistance Patterns* | Antimicrobial Resistance Genes                                      | Plasmids                | MLST |
|---------|-------|----------|------------------|--------|-----------------------------|-------------|------------------------------------|---------------------------------------------------------------------|-------------------------|------|
| 20SD01  | 2020  | Shandong | Feed             | Langya | Domestic breeds             | S. Thompson | SXT-AMX-STR-GM-AMP                 | <i>aac(3)-IId, aadA2, armA, blaTEM-1B, dfrA12, parC, qacE, sul1</i> | IncHI2, IncHI2A         | 26   |
| 20SD02  | 2020  | Shandong | Feed             | Langya | Domestic breeds             | S. Thompson | SXT-AMX-STR-GM-AMP                 | <i>aac(3)-IId, aadA2, armA, blaTEM-1B, dfrA12, parC, qacE, sul1</i> | ColpVC, IncHI2, IncHI2A | 26   |
| 20SD03  | 2020  | Shandong | Stool            | Langya | Domestic breeds             | S. Thompson | SXT-AMX-STR-GM-AMP                 | <i>aac(3)-IId, aadA2, armA, blaTEM-1B, dfrA12, parC, qacE, sul1</i> | IncHI2, IncHI2A         | 26   |
| 20SD04  | 2020  | Shandong | Parental embryos | Langya | Domestic breeds             | S. Thompson | SXT-AMX-STR-GM-AMP                 | <i>aac(3)-IId, aadA2, armA, blaTEM-1B, dfrA12, parC, qacE, sul1</i> | IncHI2, IncHI2A         | 26   |
| 20SD05  | 2020  | Shandong | Parental embryos | Langya | Domestic breeds             | S. Thompson | SXT-AMX-STR-GM-AMP                 | <i>aac(3)-IId, aadA2, armA, blaTEM-1B, dfrA12, parC, qacE, sul1</i> | IncHI2, IncHI2A         | 26   |
| 20SD07  | 2020  | Shandong | Parental embryos | Langya | Domestic breeds             | S. Thompson | SXT-AMX-STR-GM-AMP                 | <i>aac(3)-IId, aadA2, armA, blaTEM-1B, dfrA12, parC, qacE, sul1</i> | IncHI2, IncHI2A         | 26   |
| 20SD09  | 2020  | Shandong | Parental embryos | Langya | Domestic breeds             | S. Thompson | SXT-AMX-STR-GM-AMP                 | <i>aac(3)-IId, aadA2, armA, blaTEM-1B, dfrA12, parC, qacE, sul1</i> | IncHI2, IncHI2A         | 26   |
| 20SD10  | 2020  | Shandong | Parental embryos | Langya | Domestic breeds             | S. Thompson | SXT-AMX-TET-DOX-STR-GM-AMP         | <i>aac(3)-IId, aadA2, armA, blaTEM-1B, dfrA12, parC, qacE, sul1</i> | IncHI2, IncHI2A         | 26   |
| 20SD11  | 2020  | Shandong | Parental embryos | Langya | Domestic breeds             | S. Thompson | SXT-AMX-STR-GM                     | <i>aac(3)-IId, aadA2, armA, blaTEM-1B, dfrA12, parC, qacE, sul1</i> | IncHI2, IncHI2A         | 26   |
| 20SD12  | 2020  | Shandong | Parental embryos | Langya | Domestic breeds             | S. Thompson | SXT-AMX-STR-GM-AMP                 | <i>aac(3)-IId, aadA2, armA, blaTEM-1B, dfrA12, parC, qacE, sul1</i> | IncHI2, IncHI2A         | 26   |
| 20SD13  | 2020  | Shandong | Parental embryos | Langya | Domestic breeds             | S. Thompson | SXT-AMX-STR-GM-AMP                 | <i>aac(3)-IId, aadA2, armA, blaTEM-1B, dfrA12, parC, qacE, sul1</i> | IncHI2, IncHI2A         | 26   |

|        |      |          |                  |        |                 |             |                    |                                                                     |                         |    |
|--------|------|----------|------------------|--------|-----------------|-------------|--------------------|---------------------------------------------------------------------|-------------------------|----|
| 20SD14 | 2020 | Shandong | Parental embryos | Langya | Domestic breeds | S. Thompson | SXT-AMX-STR-GM     | <i>aac(3)-IId, aadA2, armA, blaTEM-1B, dfrA12, parC, qacE, sul1</i> | IncHI2, IncHI2A         | 26 |
| 20SD15 | 2020 | Shandong | Parental embryos | Langya | Domestic breeds | S. Thompson | SXT-AMX-STR-GM-AMP | <i>aac(3)-IId, aadA2, armA, blaTEM-1B, dfrA12, parC, qacE, sul1</i> | IncHI2, IncHI2A         | 26 |
| 20SD16 | 2020 | Shandong | Parental embryos | Langya | Domestic breeds | S. Thompson | SXT-AMX-STR-GM-AMP | <i>aac(3)-IId, aadA2, armA, blaTEM-1B, dfrA12, parC, qacE, sul1</i> | IncHI2, IncHI2A         | 26 |
| 20SD17 | 2020 | Shandong | Parental embryos | Langya | Domestic breeds | S. Thompson | SXT-AMX-GM-AMP     | <i>aac(3)-IId, aadA2, armA, blaTEM-1B, dfrA12, parC, qacE, sul1</i> | IncHI2, IncHI2A         | 26 |
| 20SD18 | 2020 | Shandong | Parental embryos | Langya | Domestic breeds | S. Thompson | AMX-STR-GM-AMP     | <i>aac(3)-IId, aadA2, armA, blaTEM-1B, dfrA12, parC, qacE, sul1</i> | IncHI2, IncHI2A         | 26 |
| 20SD19 | 2020 | Shandong | Parental embryos | Langya | Domestic breeds | S. Thompson | SXT-AMX-STR-GM-AMP | <i>aac(3)-IId, aadA2, armA, blaTEM-1B, dfrA12, parC, qacE, sul1</i> | IncHI2, IncHI2A         | 26 |
| 20SD20 | 2020 | Shandong | Parental embryos | Langya | Domestic breeds | S. Thompson | SXT-AMX-STR-GM-AMP | <i>aac(3)-IId, aadA2, armA, blaTEM-1B, dfrA12, parC, qacE, sul1</i> | IncHI2, IncHI2A         | 26 |
| 20SD21 | 2020 | Shandong | Parental embryos | Langya | Domestic breeds | S. Thompson | SXT-AMX-STR-GM-AMP | <i>aac(3)-IId, aadA2, armA, blaTEM-1B, dfrA12, parC, qacE, sul1</i> | IncHI2, IncHI2A         | 26 |
| 20SD22 | 2020 | Shandong | Parental embryos | Langya | Domestic breeds | S. Thompson | SXT-AMX-STR-GM-AMP | <i>aac(3)-IId, aadA2, armA, blaTEM-1B, dfrA12, parC, qacE, sul1</i> | IncHI2, IncHI2A         | 26 |
| 20SD23 | 2020 | Shandong | Parental embryos | Langya | Domestic breeds | S. Thompson | SXT-AMX-STR-GM-AMP | <i>aac(3)-IId, aadA2, armA, blaTEM-1B, dfrA12, parC, qacE, sul1</i> | IncHI2, IncHI2A         | 26 |
| 20SD24 | 2020 | Shandong | Parental embryos | Langya | Domestic breeds | S. Thompson | SXT-AMX-STR-GM-AMP | <i>aac(3)-IId, aadA2, armA, blaTEM-1B, dfrA12, parC, qacE, sul1</i> | IncHI2, IncHI2A         | 26 |
| 20SD25 | 2020 | Shandong | Parental embryos | Langya | Domestic breeds | S. Thompson | SXT-AMX-STR-GM-AMP | <i>aac(3)-IId, aadA2, armA, blaTEM-1B, dfrA12, parC, qacE, sul1</i> | ColpVC, IncHI2, IncHI2A | 26 |

|        |      |          |                  |                 |                 |                |                        |                                                                     |                      |    |
|--------|------|----------|------------------|-----------------|-----------------|----------------|------------------------|---------------------------------------------------------------------|----------------------|----|
| 20SD26 | 2020 | Shandong | Parental embryos | Langya          | Domestic breeds | S. Thompson    | SXT-AMX-STR-GM-AMP     | <i>aac(3)-IId, aadA2, armA, blaTEM-1B, dfrA12, parC, qacE, sul1</i> | IncHI2, IncHI2A      | 26 |
| 20SD27 | 2020 | Shandong | Parental embryos | Langya          | Domestic breeds | S. Thompson    | SXT-AMX-STR-GM-AMP     | <i>aac(3)-IId, aadA2, armA, blaTEM-1B, dfrA12, parC, qacE, sul1</i> | IncHI2, IncHI2A      | 26 |
| 20SD28 | 2020 | Shandong | Parental embryos | Langya          | Domestic breeds | S. Thompson    | SXT-AMX-STR-GM-AMP     | <i>aac(3)-IId, aadA2, armA, blaTEM-1B, dfrA12, parC, qacE, sul1</i> | IncHI2, IncHI2A      | 26 |
| 20SD29 | 2020 | Shandong | Parental embryos | Langya          | Domestic breeds | S. Thompson    | SXT-AMX-GM-AMP         | <i>aac(3)-IId, aadA2, armA, blaTEM-1B, dfrA12, parC, qacE, sul1</i> | IncHI2, IncHI2A      | 26 |
| 20SD30 | 2020 | Shandong | Parental embryos | Langya          | Domestic breeds | S. Thompson    | SXT-AMX-AMP            | <i>aac(3)-IId, aadA2, armA, blaTEM-1B, dfrA12, parC, qacE, sul1</i> | IncHI2, IncHI2A      | 26 |
| 20SD31 | 2020 | Shandong | Parental embryos | Langya          | Domestic breeds | S. Thompson    | AMX-STR-AMP            | <i>aac(3)-IId, aadA2, armA, blaTEM-1B, dfrA12, parC, qacE, sul1</i> | IncHI2, IncHI2A      | 26 |
| 20SD32 | 2020 | Shandong | Parental embryos | Langya          | Domestic breeds | S. Thompson    | AMX-STR-AMP            | <i>aac(3)-IId, aadA2, armA, blaTEM-1B, dfrA12, parC, qacE, sul1</i> | IncHI2, IncHI2A      | 26 |
| 20JN04 | 2020 | Shandong | Parental embryos | Bairi           | Domestic breeds | S. Enteritidis | TET-GM-AMP-AMX-DOX     | <i>aph(3'')-Ib, aph(6)-Id, blaTEM-1B, gyrA, sul2, tet(A)</i>        | IncFIB(S), IncFII(S) | 11 |
| 20JN14 | 2020 | Shandong | Parental embryos | Bairi           | Domestic breeds | S. Enteritidis | TET-GM-AMP-AMX-DOX     | <i>aph(3'')-Ib, aph(6)-Id, blaTEM-1B, gyrA, sul2, tet(A)</i>        | IncFIB(S), IncFII(S) | 11 |
| 20TA01 | 2020 | Shandong | Parental embryos | Hubbard chicken | Imported breeds | S. Enteritidis | TET-STR-GM-AMP-AMX-DOX | <i>aph(3'')-Ib, aph(6)-Id, blaTEM-1B, gyrA, sul2, tet(A)</i>        | IncFIB(S), IncFII(S) | 11 |
| 20TA15 | 2020 | Shandong | Parental embryos | Hubbard chicken | Imported breeds | S. Enteritidis | GM-AMP-AMX             | <i>dfrG, erm(B), gyrA, lsa(A), tet(L)</i>                           | IncFIB(S), IncFII(S) | 19 |
| C104   | 2021 | Zhejiang | Stool            | Broiler         | Domestic breeds | S. Typhimurium | TET-STR                | <i>gyrA</i>                                                         | IncFIB(S), IncFII(S) | 19 |
| C108   | 2021 | Zhejiang | Stool            | Broiler         | Domestic breeds | S. Typhimurium | STR                    | <i>gyrA</i>                                                         | IncFIB(S), IncFII(S) | 19 |

|      |      |          |       |         |                 |                |     |             |                         |    |
|------|------|----------|-------|---------|-----------------|----------------|-----|-------------|-------------------------|----|
| C111 | 2021 | Zhejiang | Stool | Broiler | Domestic breeds | S. Typhimurium | STR | <i>gyrA</i> | IncFIB(S),<br>IncFII(S) | 19 |
| C113 | 2021 | Zhejiang | Stool | Broiler | Domestic breeds | S. Typhimurium |     | <i>gyrA</i> | IncFIB(S),<br>IncFII(S) | 19 |
| C121 | 2021 | Zhejiang | Stool | Broiler | Domestic breeds | S. Typhimurium |     | <i>gyrA</i> | IncFIB(S),<br>IncFII(S) | 19 |
| C122 | 2021 | Zhejiang | Stool | Broiler | Domestic breeds | S. Typhimurium |     | <i>gyrA</i> | IncFIB(S),<br>IncFII(S) | 19 |
| C129 | 2021 | Zhejiang | Stool | Broiler | Domestic breeds | S. Typhimurium | STR | <i>gyrA</i> | IncFIB(S),<br>IncFII(S) | 19 |
| C130 | 2021 | Zhejiang | Stool | Broiler | Domestic breeds | S. Typhimurium | STR | <i>gyrA</i> | IncFIB(S),<br>IncFII(S) | 19 |
| C145 | 2021 | Zhejiang | Stool | Broiler | Domestic breeds | S. Typhimurium | STR | <i>gyrA</i> | IncFIB(S),<br>IncFII(S) | 19 |
| C151 | 2021 | Zhejiang | Stool | Broiler | Domestic breeds | S. Typhimurium | STR | <i>gyrA</i> | IncFIB(S),<br>IncFII(S) | 19 |
| C162 | 2021 | Zhejiang | Stool | Broiler | Domestic breeds | S. Typhimurium | STR | <i>gyrA</i> | IncFIB(S),<br>IncFII(S) | 19 |
| C170 | 2021 | Zhejiang | Stool | Broiler | Domestic breeds | S. Typhimurium |     | <i>gyrA</i> | IncFIB(S),<br>IncFII(S) | 19 |
| C182 | 2021 | Zhejiang | Stool | Broiler | Domestic breeds | S. Typhimurium |     | <i>gyrA</i> | IncFIB(S),<br>IncFII(S) | 19 |
| C185 | 2021 | Zhejiang | Stool | Broiler | Domestic breeds | S. Typhimurium |     | <i>gyrA</i> | IncFIB(S),<br>IncFII(S) | 19 |
| C190 | 2021 | Zhejiang | Stool | Broiler | Domestic breeds | S. Typhimurium | STR | <i>gyrA</i> | IncFIB(S),<br>IncFII(S) | 19 |
| C191 | 2021 | Zhejiang | Stool | Broiler | Domestic breeds | S. Typhimurium | STR | <i>gyrA</i> | IncFIB(S),<br>IncFII(S) | 19 |
| C192 | 2021 | Zhejiang | Stool | Broiler | Domestic breeds | S. Typhimurium | STR | <i>gyrA</i> | IncFIB(S),<br>IncFII(S) | 19 |
| C195 | 2021 | Zhejiang | Stool | Broiler | Domestic breeds | S. Typhimurium |     | <i>gyrA</i> | IncFIB(S),<br>IncFII(S) | 19 |
| C197 | 2021 | Zhejiang | Stool | Broiler | Domestic breeds | S. Typhimurium |     | <i>gyrA</i> | IncFIB(S),<br>IncFII(S) | 19 |
| C205 | 2021 | Zhejiang | Water | Broiler | Domestic breeds | S. Typhimurium |     | <i>gyrA</i> | IncFIB(S),<br>IncFII(S) | 19 |

|        |      |          |                    |                       |                 |                |                                   |                                                                                                                                                                     |                      |      |
|--------|------|----------|--------------------|-----------------------|-----------------|----------------|-----------------------------------|---------------------------------------------------------------------------------------------------------------------------------------------------------------------|----------------------|------|
| D2     | 2021 | Anhui    | Commercial embryos | Partfidge chicken     | Domestic breeds | S. Tennessee   | STR                               | <i>gyrA, parC</i>                                                                                                                                                   |                      | 319  |
| D5     | 2021 | Anhui    | Commercial embryos | Partfidge chicken     | Domestic breeds | S. Tennessee   | STR                               | <i>gyrA, parC</i>                                                                                                                                                   |                      | 319  |
| D84    | 2021 | Anhui    | Commercial embryos | Partfidge chicken     | Domestic breeds | S. Enteritidis |                                   | <i>gyrA</i>                                                                                                                                                         | IncFIB(S), IncFII(S) | 11   |
| D89    | 2021 | Anhui    | Commercial embryos | Partfidge chicken     | Domestic breeds | S. Gallinarum  | STR                               | <i>gyrA</i>                                                                                                                                                         | ColpVC               | 3717 |
| E17    | 2021 | Fujian   | Parental embryos   | White feather chicken | Imported breeds | S. Enteritidis | TET                               | <i>gyrA</i>                                                                                                                                                         | IncFIB(S), IncFII(S) | 11   |
| E70    | 2021 | Fujian   | Parental embryos   | White feather chicken | Imported breeds | S. Enteritidis |                                   | <i>gyrA</i>                                                                                                                                                         | IncFIB(S), IncFII(S) | 11   |
| E86    | 2021 | Fujian   | Parental embryos   | White feather chicken | Imported breeds | S. Enteritidis | TET                               | <i>gyrA</i>                                                                                                                                                         | IncFIB(S), IncFII(S) | 11   |
| E88    | 2021 | Fujian   | Parental embryos   | White feather chicken | Imported breeds | S. Enteritidis |                                   | <i>gyrA</i>                                                                                                                                                         | IncFIB(S), IncFII(S) | 11   |
| K57    | 2021 | Shandong | Parental embryos   | Bairi                 | Domestic breeds | S. Enteritidis |                                   |                                                                                                                                                                     | IncFIB(S), IncFII(S) | 11   |
| K16    | 2021 | Shandong | Parental embryos   | Bairi                 | Domestic breeds | S. Enteritidis | STR-CAZ                           |                                                                                                                                                                     | IncFIB(S), IncFII(S) | 11   |
| K6     | 2021 | Shandong | Parental embryos   | Bairi                 | Domestic breeds | S. Enteritidis |                                   |                                                                                                                                                                     | IncFIB(S), IncFII(S) | 11   |
| 21JX20 | 2021 | Shandong | Parental tissue    | Langya                | Domestic breeds | S. Kentucky    | SXT-TET-GM-STR-AMP-OF-AMX-DOX     | <i>aac(3)-Id, aac(3)-IId, aadA17, aadA7, aph(3')-Ia, ARR-2, blaCTX-M-55, blaTEM-214, dfrA14, floR, fosA3, gyrA, lnu(F), mph(A), qacE, qnrS1, rmtB, sul1, tet(A)</i> | ColpVC               | 198  |
| 21JX21 | 2021 | Shandong | Parental tissue    | Langya                | Domestic breeds | S. Kentucky    | SXT-TET-GM-STR-AMP-OF-AMX-CAZ-DOX | <i>aac(3)-Id, aac(3)-IId, aadA17, aadA7, aph(3')-Ia, ARR-2, blaCTX-M-55, blaTEM-214, dfrA14, floR, fosA3, gyrA,</i>                                                 | ColpVC               | 198  |

|        |      |          |                  |                       |                 |                       |                        |                                                                                                                                                  |                      |    |
|--------|------|----------|------------------|-----------------------|-----------------|-----------------------|------------------------|--------------------------------------------------------------------------------------------------------------------------------------------------|----------------------|----|
|        |      |          |                  |                       |                 |                       |                        | <i>lnu(F), mph(A), qacE, qnrS1, rmtB, sul1, tet(A)</i>                                                                                           |                      |    |
| T14    | 2021 | Shandong | Parental embryos | White feather chicken | Imported breeds | <i>S. Enteritidis</i> | SXT-TET-GM-STR-AMP-AMX | <i>aph(3'')-Ib, aph(6)-Id, blaTEM-1B, gyrA, sul2</i>                                                                                             | IncFIB(S), IncFII(S) | 11 |
| T28    | 2021 | Shandong | Parental embryos | White feather chicken | Imported breeds | <i>S. Enteritidis</i> | STR-AMP-AMX            | <i>aph(3'')-Ib, aph(6)-Id, blaTEM-1B, gyrA, sul2</i>                                                                                             | IncFIB(S), IncFII(S) | 11 |
| T67    | 2021 | Shandong | Parental embryos | White feather chicken | Imported breeds | <i>S. Enteritidis</i> | TET-STR-AMP-AMX        | <i>aph(3'')-Ib, aph(6)-Id, blaTEM-1B, gyrA, sul2</i>                                                                                             | IncFIB(S), IncFII(S) | 11 |
| 21SD18 | 2021 | Shandong | Parental embryos | HY-line brown layer   | Imported breeds | <i>S. Enteritidis</i> | STR                    |                                                                                                                                                  | IncFIB(S), IncFII(S) | 11 |
| A1     | 2021 | Hebei    | Parental embryos | White feather chicken | Imported breeds | <i>S. Enteritidis</i> |                        | <i>gyrA</i>                                                                                                                                      | IncFIB(S), IncFII(S) | 11 |
| A2     | 2021 | Hebei    | Parental embryos | White feather chicken | Imported breeds | <i>S. Enteritidis</i> |                        | <i>gyrA</i>                                                                                                                                      | IncFIB(S), IncFII(S) | 11 |
| B12    | 2021 | Hebei    | Parental embryos | White feather chicken | Imported breeds | <i>S. Typhimurium</i> | TET-GM-STR-AMP-AMX-DOX | <i>aadA22, aph(3'')-Ib, aph(3')-Ia, aph(6)-Id, ARR-3, blaCTX-M-65, blaOXA-10, blaTEM-70, cmlA1, dfrA14, fosA3, lnu(F), qnrS1, tet(A), tet(B)</i> | IncHI2, IncHI2A      | 34 |
| B28    | 2021 | Hebei    | Parental embryos | White feather chicken | Imported breeds | <i>S. Typhimurium</i> | TET-GM-STR-AMP-AMX-DOX | <i>aadA22, aph(3'')-Ib, aph(3')-Ia, aph(6)-Id, ARR-3, blaCTX-M-65, blaOXA-10, blaTEM-70, cmlA1, dfrA14, fosA3, lnu(F), qnrS1, tet(A), tet(B)</i> | IncHI2, IncHI2A      | 34 |
| 1–5    | 2021 | Hebei    | Parental embryos | White feather chicken | Imported breeds | <i>S. Enteritidis</i> | TET                    | <i>gyrA</i>                                                                                                                                      | IncFIB(S), IncFII(S) | 11 |
| 4–15   | 2021 | Hebei    | Parental embryos | White feather chicken | Imported breeds | <i>S. Enteritidis</i> |                        | <i>gyrA</i>                                                                                                                                      | IncFIB(S), IncFII(S) | 11 |

|      |      |       |                  |                       |                 |                       |             |                      |    |
|------|------|-------|------------------|-----------------------|-----------------|-----------------------|-------------|----------------------|----|
| 5–15 | 2021 | Hebei | Parental embryos | White feather chicken | Imported breeds | <i>S. Enteritidis</i> | <i>gyrA</i> | IncFIB(S), IncFII(S) | 11 |
|------|------|-------|------------------|-----------------------|-----------------|-----------------------|-------------|----------------------|----|

\*: ampicillin-AMP, amoxicillin-AMX, ceftazidime-CAZ, cefoxitin-FOX, tetracycline-TET, doxycycline-DOX, ofloxacin-OF, gentamicin-GM, streptomycin -STR, sulfamethoxazole-trimethoprim -SXT.

**Table S2.** Distribution of serotypes and MLST patterns for *Salmonella* isolates ( $n = 78$ ).

| Serotypes             | Sample types (no. of isolates)     |                    |                                     |                  |                             |                   |                 | MLST patterns |             |             |             |             |             |             |      |
|-----------------------|------------------------------------|--------------------|-------------------------------------|------------------|-----------------------------|-------------------|-----------------|---------------|-------------|-------------|-------------|-------------|-------------|-------------|------|
|                       | Parental dead embryos ( $n = 49$ ) | Feces ( $n = 20$ ) | Commercial dead embryos ( $n = 4$ ) | Food ( $n = 2$ ) | Parental tissue ( $n = 2$ ) | Water ( $n = 1$ ) | Total $n/N$ (%) | <i>aroC</i>   | <i>dnaN</i> | <i>hemD</i> | <i>hisD</i> | <i>purE</i> | <i>sucA</i> | <i>thrA</i> | STs  |
| <i>S. Thompson</i>    | 27                                 | 1                  | 0                                   | 2                | 0                           | 0                 | 30/78 (38.46%)  | 14            | 13          | 18          | 12          | 14          | 18          | 1           | 26   |
| <i>S. Typhimurium</i> | 1                                  | 19                 | 0                                   | 0                | 0                           | 1                 | 21/78 (26.92%)  | 10            | 7           | 12          | 9           | 5           | 9           | 2           | 19   |
| <i>S. Typhimurium</i> | 2                                  | 0                  | 0                                   | 0                | 0                           | 0                 | 2/78 (2.56%)    | 10            | 19          | 12          | 9           | 5           | 9           | 2           | 34   |
| <i>S. Enteritidis</i> | 19                                 | 0                  | 1                                   | 0                | 0                           | 0                 | 20/78 (25.64%)  | 5             | 2           | 3           | 7           | 6           | 6           | 11          | 11   |
| <i>S. Kentucky</i>    | 0                                  | 0                  | 0                                   | 0                | 2                           | 0                 | 2/78 (2.56%)    | 76            | 14          | 3           | 77          | 64          | 64          | 67          | 198  |
| <i>S. Tennessee</i>   | 0                                  | 0                  | 2                                   | 0                | 0                           | 0                 | 2/78 (2.56%)    | 118           | 107         | 8           | 51          | 2           | 117         | 16          | 319  |
| <i>S. Gallinarum</i>  | 0                                  | 0                  | 1                                   | 0                | 0                           | 0                 | 1/78 (1.28%)    | 5             | 2           | 361         | 7           | 31          | 668         | 11          | 3717 |

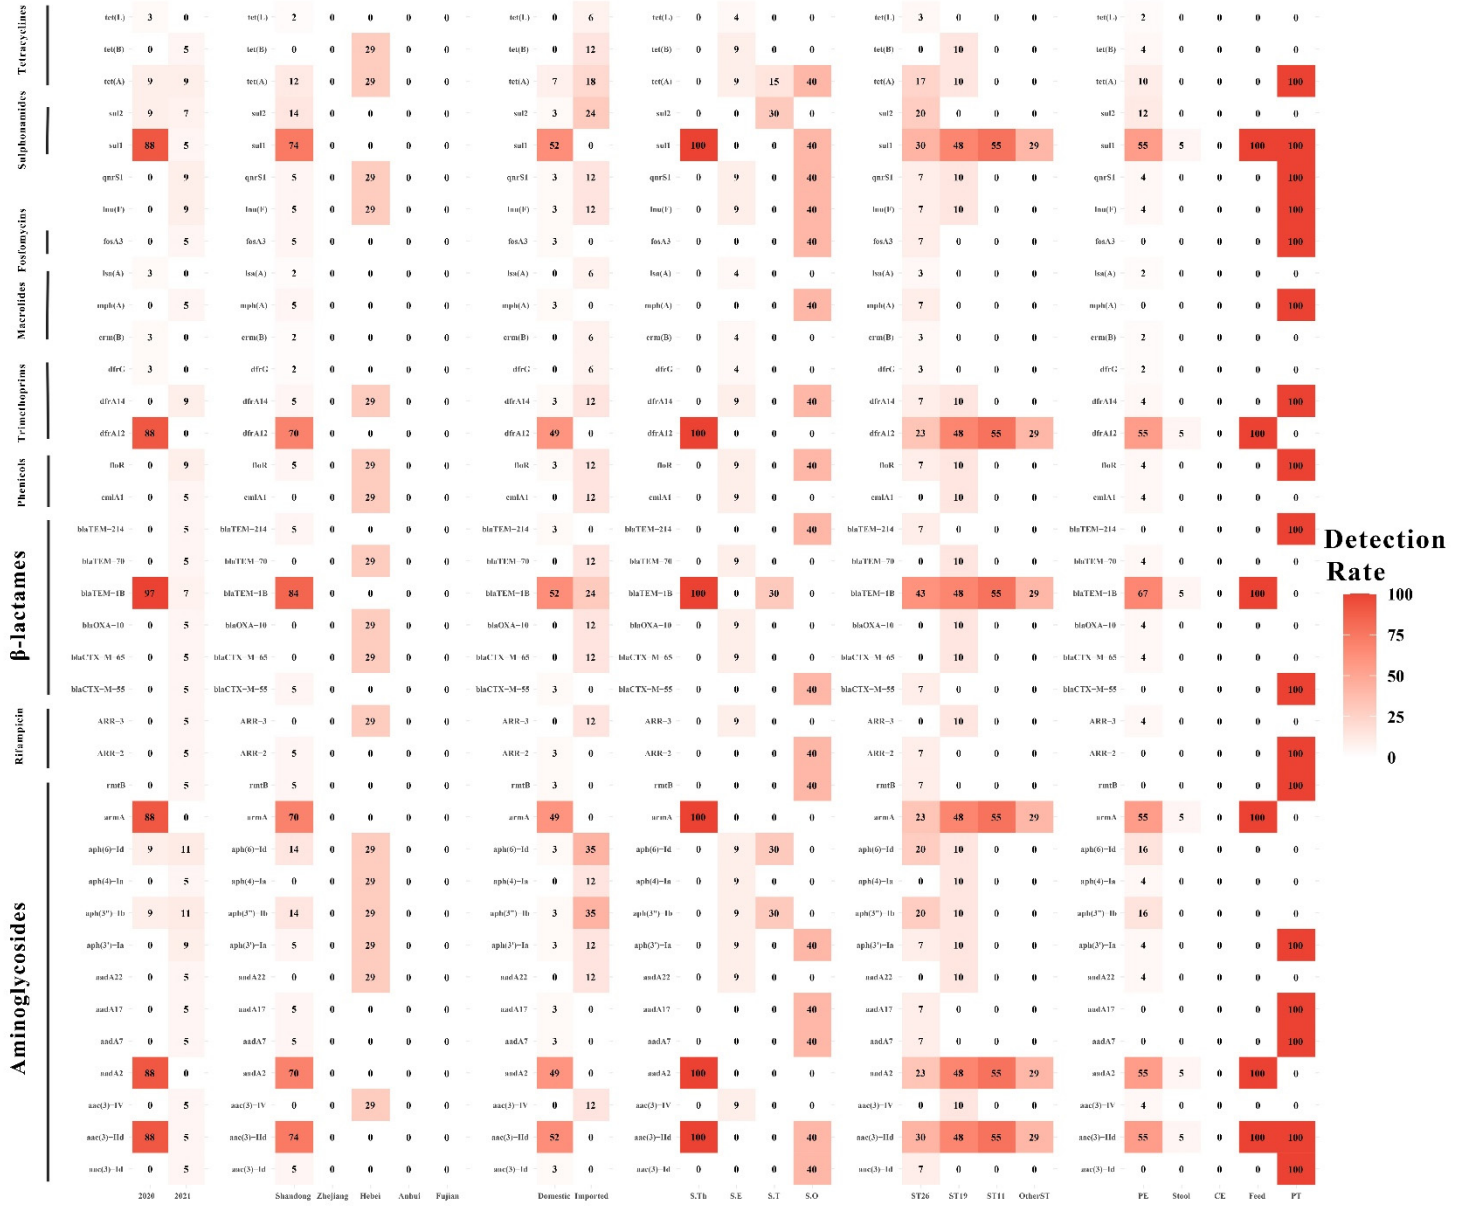

**Figure S1.** The heatmap of antimicrobial resistance genes in the studied NTS isolates.



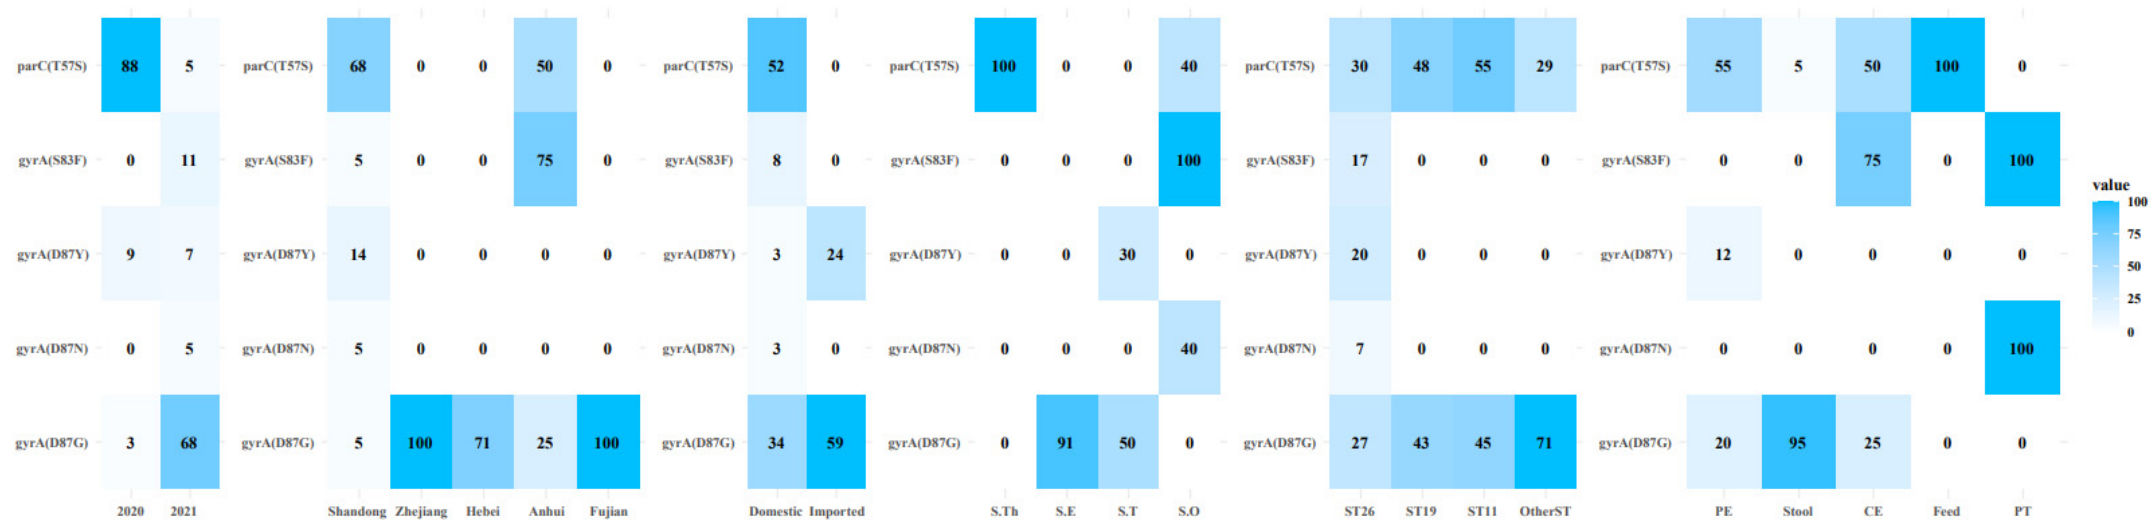

**Figure S2.** The heatmap of chromosomal mutations in NTS isolates.

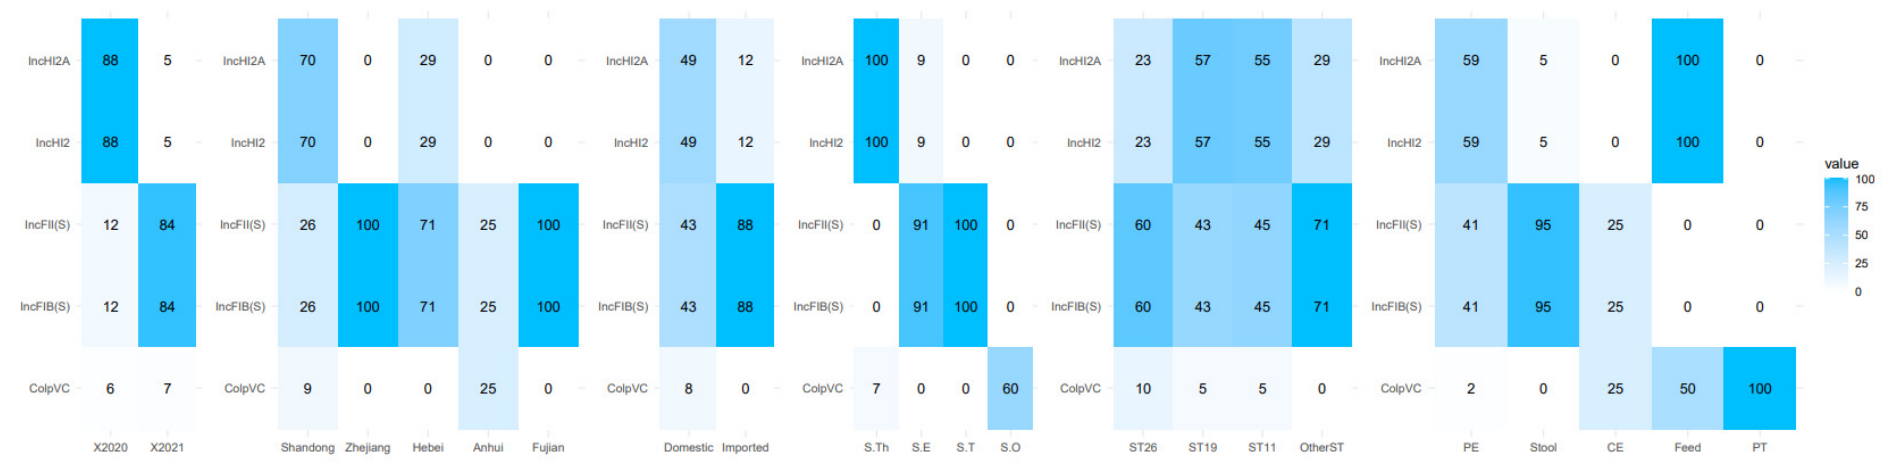

**Figure S3.** The heatmap of plasmids distribution in *Salmonella* isolates.

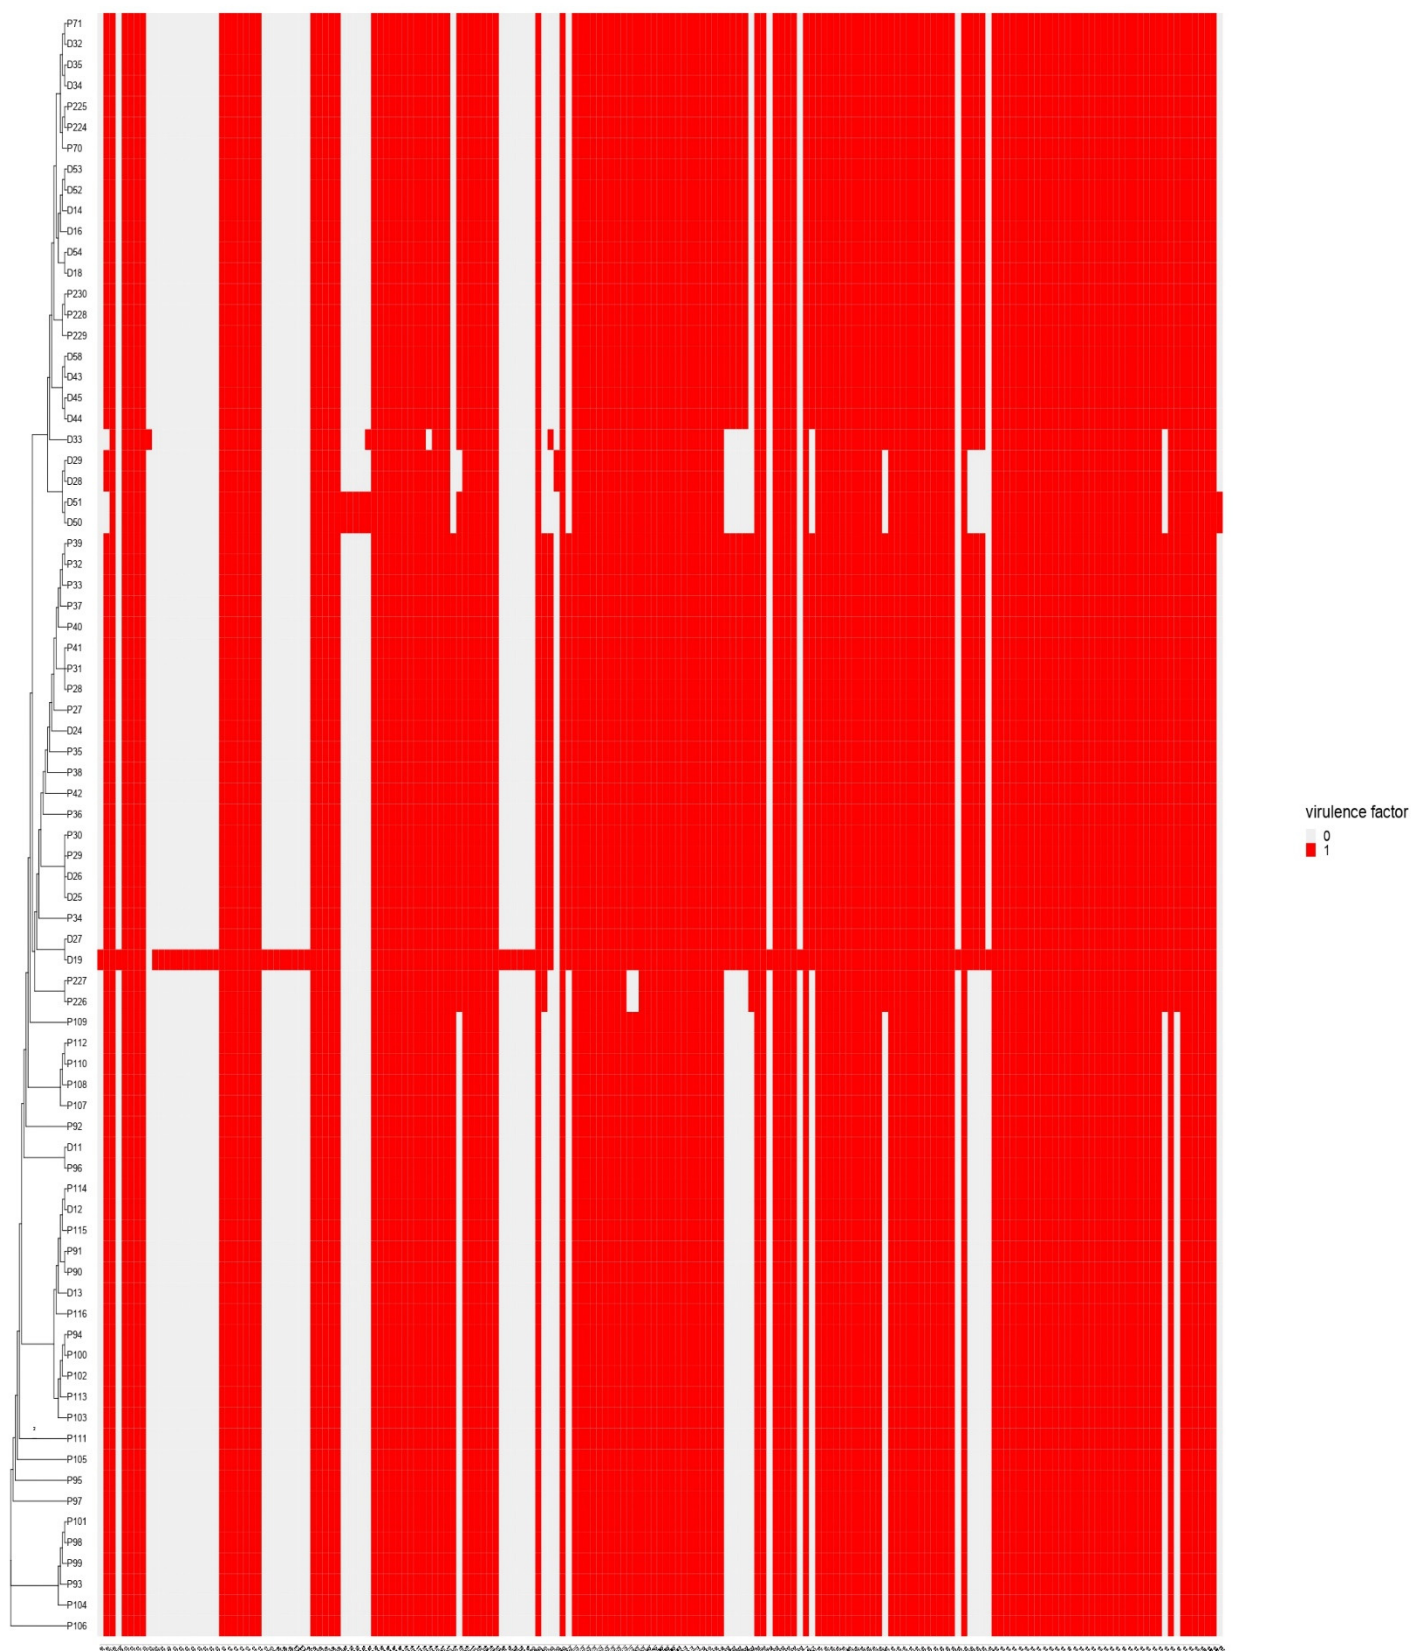

**Figure S4.** Virulence gene detection based on WGS of *Salmonella* strains.
